# Supplementary material
Source: PubMed Central journal article supplement (PMC1488924)

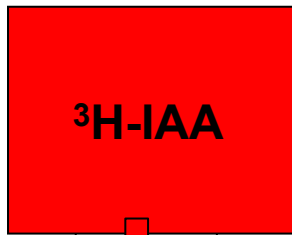

$^3\text{H-IAA}$

Segment  
above  
treatment

**Treatment**

Segment  
below  
treatment

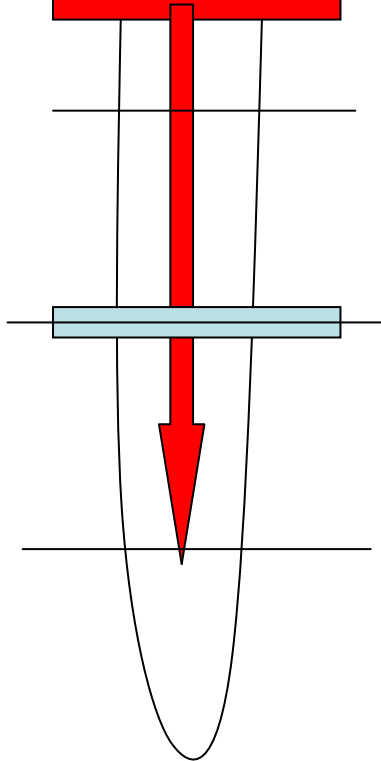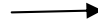

**Scintillation  
counting**

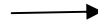

Supplement: plntcell_tpc.105.038232_4.pdf [file plntcell_tpc.105.038232_4.pdf]
