# Supplementary material
Source: PubMed Central journal article supplement (PMC1488924)

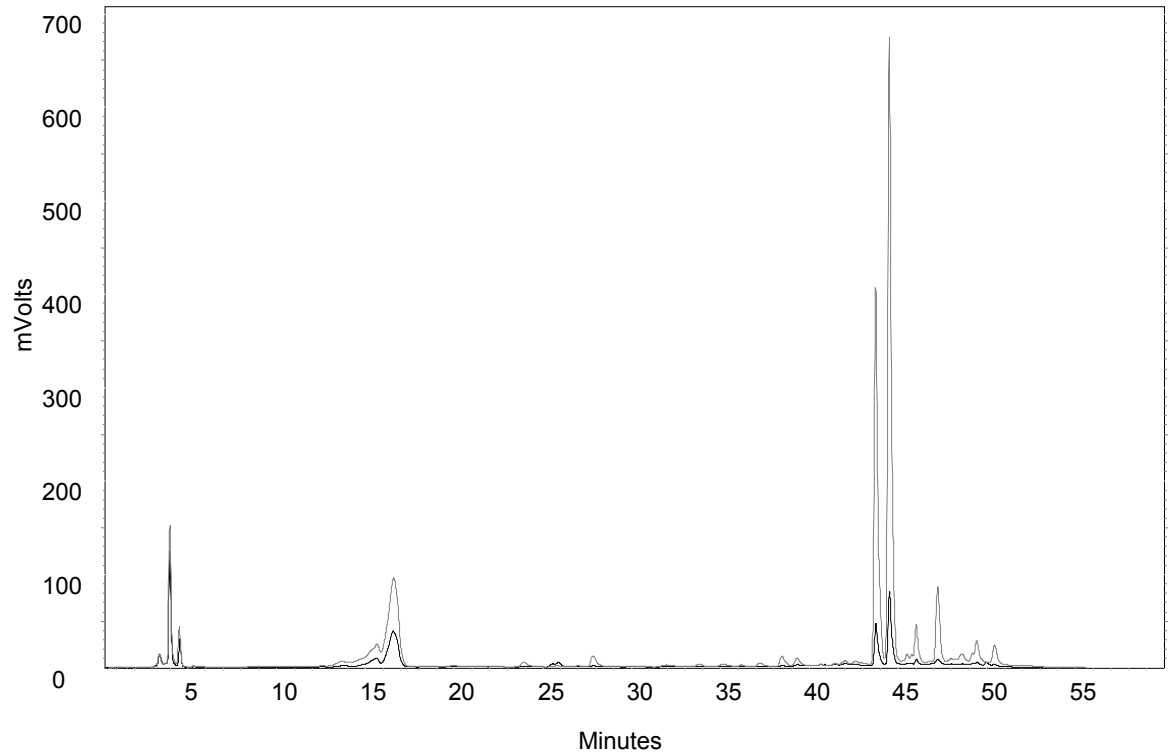

Supplement: plntcell_tpc.105.038232_1.pdf [file plntcell_tpc.105.038232_1.pdf]

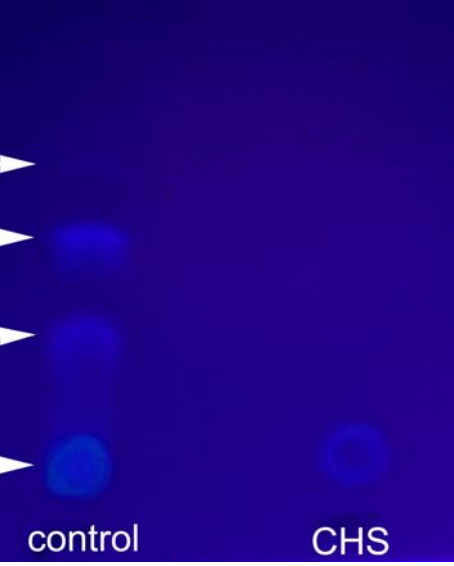

Supplement: plntcell_tpc.105.038232_2.pdf [file plntcell_tpc.105.038232_2.pdf]

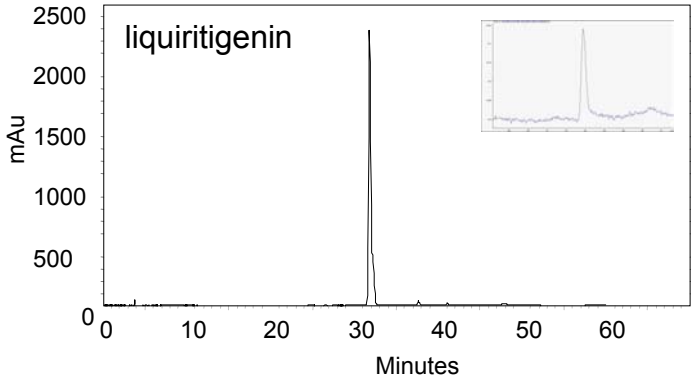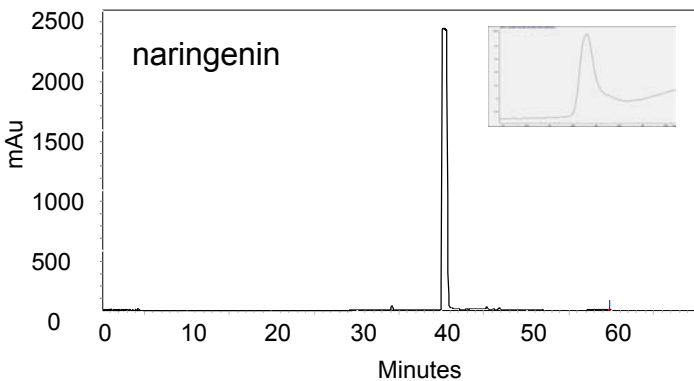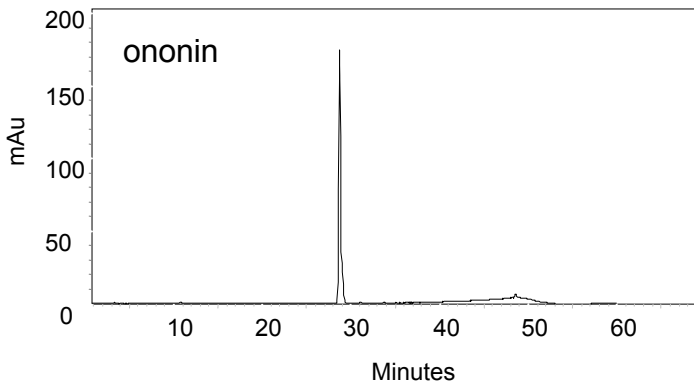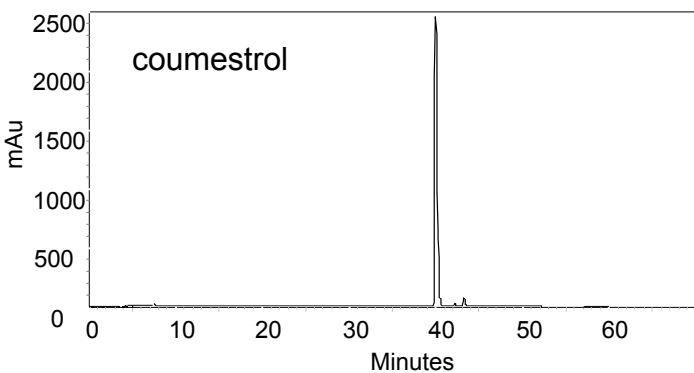

Supplement: plntcell_tpc.105.038232_3.pdf [file plntcell_tpc.105.038232_3.pdf]

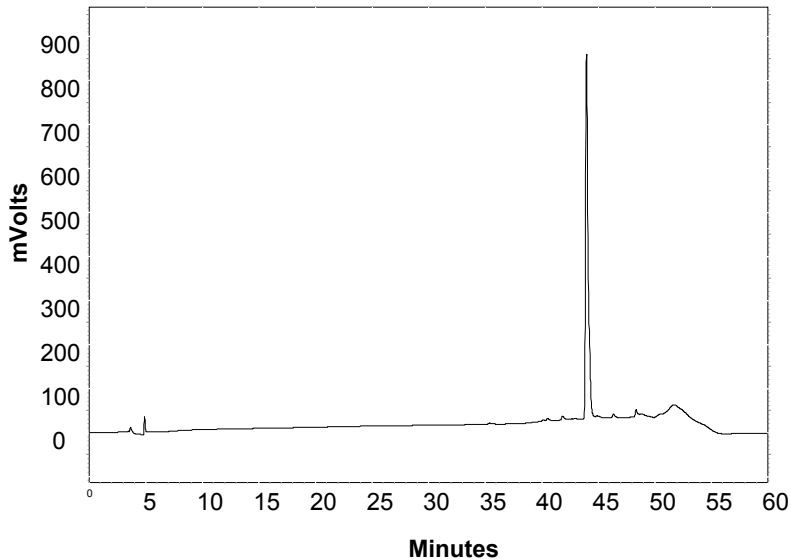

Medicarpin standard, fluorescence emission

Supplement: plntcell_tpc.105.038232_5.pdf [file plntcell_tpc.105.038232_5.pdf]
